# Supplementary material
Source: HighWire-hosted journal article supplement (https://bmjopen.bmj.com/content/6/4/e010767)
Supplement: inline-supplementary-material-1 [file inline-supplementary-material-1.pdf]

Supplementary information: MEDLINE search strategy (amended for other databases)

- 1 exp Dementia/ (124260)
- 2 Wernicke Encephalopathy/ (1400)
- 3 Delirium, Dementia, Amnesic, Cognitive Disorders/ (8561)
- 4 dement\*.mp. (89834)
- 5 alzheimer\*.mp. (99375)
- 6 (lewy\* adj2 bod\*).mp. (6439)
- 7 (chronic adj2 cerebrovascular).mp. (434)
- 8 ("organic brain disease" or "organic brain syndrome").mp. (750)
- 9 ("normal pressure hydrocephalus" and "shunt").mp. (957)
- 10 "benign senescent forgetfulness".mp. (17)
- 11 (cerebr\* adj2 deteriorat\*).mp. (187)
- 12 (cerebral\* adj2 insufficient\*).mp. (61)
- 13 (pick\* adj2 disease).mp. (2843)
- 14 (creutzfeldt or jcd or cjd).mp. (7314)
- 15 huntington\*.mp. (13552)
- 16 binswanger\*.mp. (536)
- 17 korsako\*.mp. (1410)
- 18 or/1-17 (183240)
- 19 (review or review,tutorial or review, academic).pt. (1940076)
- 20 (medline or medlars or embase or pubmed or cochrane).tw,sh. (87274)
- 21 (scisearch or psychinfo or psycinfo).tw,sh. (7153)
- 22 (psychlit or psyclit).tw,sh. (853)
- 23 cinahl.tw,sh. (9786)
- 24 ((hand adj2 search\$) or (manual\$ adj2 search\$)).tw,sh. (6938)
- 25 (electronic database\$ or bibliographic database\$ or computeri?ed database\$ or online database\$).tw,sh. (13875)
- 26 (pooling or pooled or mantel haenszel).tw,sh. (53468)
- 27 (peto or dersimonian or der simonian or fixed effect).tw,sh. (3389)
- 28 (retraction of publication or retracted publication).pt. (6615)
- 29 or/20-28 (148342)
- 30 19 and 29 (75890)
- 31 meta-analysis.pt. (54551)
- 32 meta-analysis.sh. (54551)
- 33 (meta-analys\$ or meta analys\$ or metaanalys\$).tw,sh. (84950)
- 34 (systematic\$ adj5 review\$).tw,sh. (59103)
- 35 (systematic\$ adj5 overview\$).tw,sh. (846)
- 36 (quantitativ\$ adj5 review\$).tw,sh. (4526)
- 37 (quantitativ\$ adj5 overview\$).tw,sh. (180)
- 38 (quantitativ\$ adj5 synthesis\$).tw,sh. (1295)
- 39 (methodologic\$ adj5 review\$).tw,sh. (3182)
- 40 (methodologic\$ adj5 overview\$).tw,sh. (225)
- 41 (integrative research review\$ or research integration).tw. (89)
- 42 or/31-41 (128647)
- 43 30 or 42 (163539)
- 44 18 and 43 (2989)
- 45 Activities of Daily Living/ (51574)
- 46 (independ\* or function\* or disability or activit\* or ADL\* or depend\*).tw. (5380029)
- 47 45 or 46 (5395277)
- 48 44 and 47 (1400)
- 49 limit 48 to (english language and humans) (1310)
